# 1 T cell stimulation remodels the latently HIV-1 infected cell population 2 by differential activation of proviral chromatin

3  
4  
5

6 Birgitta Lindqvist<sup>1</sup>, Wlaa Assi<sup>1,2</sup>, Julie Roux<sup>1</sup>, Luca Love<sup>1</sup>, Bianca B. Jütte<sup>1</sup>, Anders Sönnnerborg<sup>3</sup>,  
7 Tugsan Tezil<sup>4</sup>, Eric Verdin<sup>4</sup>, J. Peter Svensson<sup>1</sup>

8

9 <sup>1</sup> Department of Biosciences and Nutrition, Karolinska Institutet, Huddinge, Sweden

10 <sup>2</sup> Laboratory of Viral Infectious Diseases, Department of Computational Biology and Medical Sciences,  
11 Graduate School of Frontier Sciences, The University of Tokyo, Japan

12 <sup>3</sup> Division of Clinical Microbiology, Department of Laboratory Medicine, Karolinska Institutet,  
13 Stockholm, Sweden, Division of Infectious Diseases, Department of Medicine Huddinge, I73,  
14 Karolinska University Hospital, Stockholm, Sweden

15 <sup>4</sup> Buck Institute for Research on Aging, Novato, CA, USA.

16

17 Correspondence to J.P.S. ([peter.svensson@ki.se](mailto:peter.svensson@ki.se))

18

19

20

## 21 Abstract

22 The reservoir of latently HIV-1 infected cells is heterogeneous. To achieve an HIV-1 cure, the reservoir  
23 of activatable proviruses should be eliminated while permanently silenced proviruses may be tolerated.  
24 We have developed a method to assess the proviral nuclear microenvironment in single cells. In latently  
25 HIV-1 infected cells, a zinc finger protein tethered to the HIV-1 promoter produced a fluorescent signal  
26 as a protein of interest came in its proximity, such as the viral transactivator Tat when recruited to the  
27 nascent RNA. Tat is essential for viral replication. In these cells we assessed the proviral activation and  
28 chromatin composition. By linking Tat recruitment to proviral activity, we dissected the mechanisms of  
29 HIV-1 latency reversal and the consequences of HIV-1 production. A pulse of promoter-associated Tat  
30 was identified that contrasted to the continuous production of viral proteins. As expected, promoter  
31 H3K4me3 led to substantial expression of the provirus following T cell stimulation. However, the  
32 activation-induced cell cycle arrest and death led to a surviving cell fraction with proviruses  
33 encapsulated in repressive chromatin. Further, this cellular model was used to reveal mechanisms of  
34 action of small molecules. In a proof-of-concept study we determined the effect of an enhancer specific  
35 CBP/P300-inhibitor on HIV-1 latency reversal. Only proviruses resembling active enhancers, associated  
36 with H3K4me1 and H3K27ac, efficiently recruited Tat. Tat-independent HIV-1 latency reversal of  
37 unknown significance still occurred. We present a method for single cell assessment of the  
38 microenvironment of the latent HIV-1 proviruses, used here to reveal how T cell stimulation modulates  
39 the proviral activity and how the subsequent fate of the infected cell depends on the chromatin context.

40 Keywords: epigenetics, single cell, HIV latency reversal, transcription, T cell activation, proximity-  
41 ligation assay, PLA, GNE049

## 42 Introduction

43 Despite antiretroviral therapy (ART) potently inhibiting HIV-1 replication, the intact HIV-1 genome  
44 persists in infected cells. Most of these cells do not produce viral particles and hence make up the latent  
45 reservoir. Some proviral transcription is observed in these cells but rarely are the transcripts translated  
46 (Yukl et al., 2018). Thereby the cells evade immune recognition. Efforts to stimulate the cells and expose  
47 them as infected to the immune system has failed clinically as even the strongest activators lead to  
48 limited HIV-1 latency reversal (Battivelli et al., 2018; Sarabia et al., 2021). Among people living with  
49 HIV-1, rare individuals naturally control viral replication, a control driven by a potent immune response  
50 that kill cells exposing viral proteins (Migueles et al., 2008) in combination with a majority of proviruses  
51 integrated in repressive chromatin (Jiang et al., 2020). This combined approach of eliminating the  
52 reservoir of activatable proviruses while tolerating permanently silenced proviruses, produces a  
53 sustained, drug-free HIV-1 remission—a *de facto* HIV-1 cure.

54 To reproduce this HIV-1 remission clinically in a more general population, we must specifically target  
55 each sub-compartment of the latent reservoir subsequently. As discrete sub-compartments may be under  
56 specific control, first we need to delineate the distinct mechanisms governing HIV-1 latency reversal  
57 (Sherrill-Mix et al., 2013). A well-studied reservoir fraction contains proviruses integrated in active  
58 regions. Where the HIV-1 promoter is associated with the H3K4me3 chromatin mark. These open  
59 chromatin structures contain most proviruses upon initial integration (Chen et al., 2017; Battivelli et al.,  
60 2018). As the HIV-1 capsid enters the nucleus through the nuclear pore (Bejarano et al., 2019; Blanco-  
61 Rodriguez et al., 2020), the provirus almost immediately integrates, usually within a short distance  
62 (Marini et al., 2015; Burdick et al., 2020). The microenvironment of the nuclear pore is a highly  
63 transcriptionally permissive location (Capelson et al., 2010). Even intron-containing HIV-1 transcripts  
64 may be exported through the nuclear pore once chaperoned by the viral Rev protein (Coyle et al., 2011).  
65 Stochastic induction of latency is reversed upon T cell activation when growth factors and nutrient  
66 supply become abundant and the NFκB transcription factor binds to the promoter region. Metabolic  
67 activity enables HIV-1 latency reversal (Besnard et al., 2016). The gene-like structure allows mRNA  
68 processing and translation of viral proteins, including the essential transactivator of transcription Tat.  
69 Another reservoir sub-compartment is contained in enhancer-like structures. Also these proviruses  
70 remain accessible and with high reactivation potential (Chen et al., 2017; Battivelli et al., 2018; Lucic  
71 et al., 2019). Enhancer chromatin structures enable long-term reactivatable latency as it provides an  
72 open chromatin without mRNA production (Lindqvist et al., 2020). In contrast, the initially rare cellular  
73 fractions where proviral genomes are encapsulated in heterochromatin marks H3K9me3 or H3K27me3  
74 have low reactivation potential (du Chene et al., 2007; Kauder et al., 2009; Battivelli et al., 2018).  
75 H3K9me3 contained proviruses may still be activated by knock-down of heterochromatin protein 1  
76 (HP1) (du Chene et al., 2007) but their clinical contribution is questionable. Further, the HIV-1 reservoir  
77 is dynamic and evolves over time (Bruner et al., 2019; Pinzone et al., 2019; Simonetti et al., 2020).  
78 Proviruses in heterochromatin gradually take on a larger fraction of the HIV-1 infected cells, on expense  
79 of proviruses with components of actively transcribed regions (Lindqvist et al., 2020). Heterochromatin  
80 forms over the HIV-1 promoter in the absence of functional Tat (Li et al., 2019).

81 For *in vivo* replication of the HIV-1, the Tat protein is essential. In an early step of HIV-1 latency  
82 reversal, Tat is recruited to the promoter to override the host-controlled transcription machinery and  
83 augment proviral expression (Morton et al., 2019). Tat binds to an initial nucleotide sequence of the  
84 nascent HIV-1 RNA. It then recruits and modifies the P-TEFb complex to enable transcription  
85 elongation. Once host mechanisms are assembled for transcription, Tat is acetylated and loses its affinity  
86 for RNA (Kiernan et al., 1999; Kaehlcke et al., 2003). In the viral circuitry, Tat has been proposed to  
87 generate promoter toggling, *i.e.* being responsible for both the ON and OFF switch of the HIV-1 provirus  
88 (Razooky et al., 2017). Except for regulating the HIV-1 promoter, ectopic expression of Tat has been  
89 observed to have affinity for other genomic regions (Marban et al., 2011; Reeder et al., 2015). Apart  
90 from promoting transcription, Tat stimulates activation induced cell death (AICD) (Gülöw et al., 2005).  
91 AICD is a naturally occurring process where activated T cells induce apoptosis after an immune  
92 response as to maintain the balance of T cells once infection is cleared. In this process, the cells progress  
93 through the cell cycle and arrest in G1 (Lissy et al., 1998). As cell stress and death in itself induce HIV-

94 1 reactivation (Khan et al., 2015) and cells with activated HIV-1 express toxic viral proteins that further  
95 reduce the viability of virus, this generates a positive feed-back loop of HIV-1 latency reversal and cell  
96 death. This process becomes particularly strong in cellular models. In models with a late readout such  
97 as the accumulated production of p24 (or a reporter protein such as GFP), HIV-1 latency reversal  
98 induced by T cell activation or as a consequence of AICD, become inseparable.

99 Here we present a single cell method to assess chromatin at the HIV-1 locus and link it to early stages  
100 of HIV-1 activation. Using this method, we show that upon T cell stimulation, Tat was transiently  
101 recruited to the HIV-1 promoter in proliferating cells. Following T cell stimulation, the proviral  
102 chromatin landscape within the HIV-1 infected cells was altered due to selective cell death. We also  
103 found that Tat was uniquely present at the HIV-1 promoter when it had enhancer features delivered by  
104 CBP/P300.

## 105 Results

106 Labeling of the HIV-1 provirus to enable proximity ligation assay at the promoter  
107 To study the microenvironment of the HIV-1 promoter in single cells, we adapted the well-established  
108 proximity ligation assay (PLA) (Soderberg et al., 2006). Performing PLA in fixed cells attached to  
109 microscope cover slips results in a bright fluorescent signal when two query proteins are within 40 nm  
110 of each other (Fig 1A). PLA relies on the proximity of two antibodies that have been conjugated with  
111 an oligonucleotide probe. To enable detection of the integrated HIV-1, we tethered a small protein to  
112 the proviral promoter region. Zinc finger proteins (ZFP) bind to DNA sequence in a highly specific  
113 manner. A specific protein, ZFP3, has been artificially constructed to recognize the HIV-1 promoter,  
114 adjacent to the NFκB binding sites (Wang et al, 2014). We cloned a FLAG-labelled ZFP3 protein into  
115 a lentiviral plasmid under the SFFV promoter. The ZFP3 sequence was linked to the BFP sequence  
116 through the sequence for a self-cleaving P2A peptide. Lentiviral particles were transduced into J-lat 5A8  
117 cells, a Jurkat cell line harboring a single copy of latent HIV-1 (Jordan et al., 2003; Chan et al., 2013).  
118 The latent reporter HIV-1 in 5A8 cells is a full-length mutated provirus where *env* has a frame-shift  
119 mutation and *nef* is replaced by a GFP coding sequence. After clonal expansion of ZFP3-BFP transduced  
120 cells, for further studies we selected a clone, 1C10, with 96.4 % ZFP3 positive cells, as identified by  
121 BFP expression (Fig S1A). The FLAG-ZFP3 protein was present in 1C10 cells in both unstimulated  
122 cells and cells stimulated with phorbol 12-myristate 13-acetate and ionomycin (PMA/i) as confirmed by  
123 immunoblotting (Fig 1B).

124 The engineered zinc-finger protein ZFP3 binds to the HIV-1 promoter

125 Next, we tested the binding specificity of the engineered ZFP3 to its target DNA sequence. The ZFP3  
126 recognizes a 14nt sequence found in the proviral long terminal repeat (LTR) (position 408–422 at the  
127 5'LTR and 9,493–9,507 at the 3'LTR in the reference HXB2 sequence) which is between the NFκB  
128 binding sites and the transcription start site (TSS) (Wang et al., 2014). Chromatin immunoprecipitation  
129 (ChIP) followed by qPCR was used with four primer pairs against the 5'LTR, the first transcribed  
130 nucleosome *nuc-1*, further downstream *gag* and the human gene *rpp30* as reference. The data confirm  
131 that the ZFP3 binds preferentially to the LTR region of the provirus (Fig 1C). The ChIP generated low  
132 DNA yield as expected from the low ZFP3-FLAG abundance and high binding specificity. We also  
133 performed ChIP followed by massive parallel sequencing (ChIP-seq) to identify other regions in the  
134 human genome where the ZFP3 protein might bind. In replicate experiments ( $n=2$ ) we performed  
135 MACS2 peak calling (Table S1). Stringent selection criteria ( $FDR < 10^{-10}$ , peak width  $< 1$ kb in both  
136 replicates) identified the HIV-1 provirus as the single binding site of ZFP3 (Fig 1D), at a peak from 293-  
137 470 (9,327–9,556) overlapping the expected binding sequence. This confirmed that the ZFP3 protein  
138 uniquely marks the HIV-1 provirus in 1C10 cells, which enables the use of the PLA technique to study  
139 the microenvironment of the HIV-1 provirus in single cells.

140 Detecting HIV-1 activation by proximity of Tat and ZFP3

141 Our first aim was to detect activation of the HIV-1 provirus by investigating the recruitment of Tat to  
142 the HIV-1 promoter. We performed PLA with antibodies against both Tat and the FLAG-epitope of

143 ZFP3 in the 1C10 J-lat cells (Fig 1E). Cells were adhered to coated coverslips and a slightly modified  
144 PLA protocol was followed. The low abundance of both Tat and FLAG in the cells prompted us to  
145 reduce the background signal of the method. Most notably the concentration of enzymes and antibodies  
146 were lowered. As the HIV-1 provirus was linked to the GFP coding sequence, we also measured the  
147 GFP expression in the same cells. After completion of the PLA protocol, the native GFP signal was  
148 obscured, possibly because of destruction of the GFP 3D-structure. To compensate for this, we used a  
149 FITC-conjugated antibody against GFP for detection. Nuclei were counterstained with DAPI. After  
150 staining and mounting of the coverslip, the PLA and GFP signals were recorded in a slide scanner  
151 scoring 500-5,000 cells for each coverslip. The images were automatically and computationally  
152 processed using a custom script. Nuclei were identified and the nuclear area was calculated. In the  
153 orange channel for PLA, foci were detected at a range of thresholds for the fluorescent intensity (Fig  
154 S1B). Based on control experiments, we calculated an arbitrary PLA threshold, that was used throughout  
155 the experiments, but slightly adjusted in few samples to account for experimental variability. The cells  
156 with a nucleus containing a single focus were considered PLA<sup>+</sup>. Rare nuclei with multiple foci were not  
157 counted. From the green channel, the average GFP intensity over the nucleus was recorded.

158 In DMSO treated samples, where Tat was not expected to be expressed, the background level of Tat-  
159 ZFP3 PLA<sup>+</sup> cells was 1.9±0.2 % in cells treated with DMSO for 16 h. Upon 16 h of treatment with  
160 PMA/i to stimulate the cells and activate the provirus, 5.3±1.2 % (*n*=5) of the cells were PLA positive  
161 (Fig 1F). To test the sensitivity of the PLA method, we included the parental 5A8 cells. Tat-ZFP3 PLA  
162 nuclear spots were found in 1.5±0.1 % of the 5A8 cells lacking FLAG-ZFP3 regardless of cellular  
163 activation status. The activated cells had 27±5 % of GFP<sup>+</sup> cells in both cell lines, with a background of  
164 1.5±0.3 % in DMSO treated cells (Fig 1G). The unstimulated Tat-ZFP3 PLA<sup>+</sup> cells contain  
165 spontaneously activated proviruses as well as technical artefacts. These cells did not express GFP above  
166 background levels (Fig S1C). Flow cytometry data of the 1C10 cell lines showed 0.19 % of unstimulated  
167 cells spontaneously expressing GFP and 19.3 % of stimulated cells expressed GFP (Fig S1D). The  
168 similarity in response to T cell stimulation in the two cell lines differing in ZFP3 status demonstrated  
169 that tethering ZFP3 to the HIV-1 promoter did not interfere with the proviral activation. Overall, the  
170 Tat-ZFP PLA<sup>+</sup> and the GFP<sup>+</sup> cells only partially overlap (Fig 1H). This suggests that the two read-outs  
171 capture different though overlapping aspects of the HIV-1 activation.

172 As the nuclear position of the provirus can be determined in our samples, we calculated the distance  
173 from the PLA spot to the nuclear periphery. As expected from literature, most proviruses were at the  
174 nuclear envelope or close to the edge of the nucleus (Fig 1I). After T cell stimulation, the provirus was  
175 found even closer to the nuclear periphery (Fig S1E)

176 Tat is found mainly at the proximity of the HIV-1 promoter in activated cells  
177 Tat under an ectopic promoter has been reported to have affinity for many genomic regions in  
178 unstimulated Jurkat cells (Marban et al., 2011; Reeder et al., 2015). This raised our concern as high  
179 levels of non-HIV-1 Tat potentially could increase unspecific background signal in our experiments.  
180 Therefore, we mapped Tat in our HIV-1 containing 1C10 J-lat cells with and without T cell stimulation.  
181 As expected, immunoblotting revealed detectable but low levels of Tat in the unstimulated 1C10 cells.  
182 The levels of Tat increased after T cell stimulation (Fig 2A). ChIP-qPCR showed that Tat was preferably  
183 found at the HIV-1 promoter in stimulated cells (Fig 2B). To map the genome-wide distribution of Tat  
184 in the nucleus, we performed ChIP-seq. Sequence reads were quality controlled to have MAPQ>20. Tat  
185 peaks were detected by the MACS2 algorithm where we compared anti-Tat to input for both activated  
186 and resting cells. In this experiment with duplicate samples, we identified 78 Tat peaks in both replicates  
187 of the stimulated cells and no peaks in unstimulated cells (Table S1). The sequences of the peaks were  
188 analyzed for consensus sequence motifs, but none were identified. Among the highly significant regions  
189 (FDR<10<sup>-5</sup> in both replicates), six regions were identified whereof the most significant region was just  
190 downstream of the HIV-1 TSS. The other regions included the splice acceptor within the HIV-1 *env*  
191 region, as well as four regions of the host genome. We performed a GO analysis of the Tat-associated  
192 regions and found no significant terms enriched. The four non-HIV-1 peaks were found in gene-depleted  
193 regions with no obvious link to HIV-1 or T cell activation. After PMA/i exposure, a minor local



194 accumulation of Tat was found on chr 2 at the *MAT2A* locus (Fig S1F). This is the genomic integration  
195 site of the HIV-1 provirus in these J-lat cells (Chan et al., 2013).

196 Even though we did not clearly identify non-HIV-1 positions associated with Tat binding, we mapped  
197 previously identified regions to our dataset. We interrogated the 6,114 peaks associated with Tat binding  
198 in unstimulated Jurkat cells (Reeder et al., 2015) (Fig 2C) and indeed observed Tat at these regions in  
199 our unstimulated 1C10 cells. However, in the activated cells, the metagene curve was suppressed, with  
200 only background variation remaining. The loss of non-HIV-1 Tat during T cell activation became even  
201 more noticeable as the decline of Tat at these regions mirrored the Tat profile in unstimulated cells. As  
202 an example of these regions, we specifically assessed the locus encoding CD69 (Fig 2D). The browser  
203 view demonstrates noticeable levels of Tat at the CD69 promoter locus in unstimulated cells noted  
204 previously (Reeder et al., 2015). However, after cellular stimulation, Tat has been redistributed to other  
205 regions. This confirms that in stimulated cells under physiological Tat protein levels, Tat binds uniquely  
206 to the HIV-1 provirus. Interestingly though, in stimulated cells, apart from the LTR promoter, also an  
207 *env* fraction of HIV-1 regions appeared to be associated with Tat, and possibly a fragment within the 3'  
208 *pol* region (Fig 2E).

209 PLA and GFP capture different aspects of drug-induced HIV-1 activation

210 We then sought to determine the effect of latency reversal agents (LRAs) using Tat-ZFP3 PLA. In  
211 contrast to other methods that detect transcription irrespective of Tat status, we uniquely detect Tat-  
212 dependent transcription. Here we assessed latency reversal 16 h after exposure to six commonly studied  
213 LRAs, alone or in combination and at different concentrations. These drugs were the protein kinase C  
214 agonists bryostatin and PEP005, histone deacetylase inhibitor romidepsin, BET bromodomain inhibitor  
215 JQ1, and the DNMT inhibitor 5-aza-2'-deoxycytidine (5azadC) (Fig S2A). The experiment was  
216 controlled by PMA/i-induced T cell activation. We compared the Tat-ZFP3 PLA results to the  
217 expression of GFP in the same cells on the same coverslip (Fig S2B). The GFP measurements based on  
218 PLA largely recapitulate our previous results from flow cytometry in the parental 5A8 cell line  
219 (Lindqvist et al., 2020). T cell stimulation by PMA/i reactivated HIV-1 as detected by both PLA and  
220 GFP. However, among the potential LRAs, only the high dose of panabinstat (150  $\mu$ M) significantly  
221 reversed latency detected in both read-outs. Low correlation (0.3) was determined between the GFP and  
222 PLA signals. Fitting a straight line through the data points resulted in a goodness-of-fit ( $R^2$ ) of 0.1 (Fig  
223 S2C). This suggests that different aspects of latency reversal are captured by the two methods, and that  
224 the observed GFP signal in the cell model is only partially mediated by Tat-dependent transcription.

225 The dynamics of Tat-promoter interactions during cellular activation

226 To determine the dynamics of Tat recruitment to the HIV-1 promoter during T cell stimulation, we  
227 performed a time-series experiment (Fig 3). During 24 h after cellular exposure to PMA/i or DMSO, the  
228 appearance of PLA spots representing Tat in the vicinity of the promoter was recorded. As expected,  
229 the frequency of cells with a single Tat-ZFP3 PLA spot in the nucleus increased in time in the stimulated  
230 cells (Fig 3A). Interestingly, an early background signal could be detected that peaked at 6 h after DMSO  
231 addition and then decreased, probably this is an effect of cell handling at the beginning of the experiment.  
232 At 15 h after addition of PMA/i, the Tat-ZFP3 PLA spots were above the background of DMSO-treated  
233 cells. After 18 h, the frequency of Tat-ZFP3 PLA<sup>+</sup> cells no longer increased. In contrast, the frequency  
234 of GFP<sup>+</sup> cells steadily increased from 9 h after T cell stimulation (Fig 3B). We also examined the GFP  
235 levels in the Tat-ZFP3 PLA<sup>+</sup> cells. Even though Tat at the HIV-1 promoter was detected in few cells at  
236 12 h after T cell stimulation, these cells were expressing GFP above background ( $p < 0.05$ ) (Fig 3C).

237 Apart from HIV-1 promoter DNA, ZFP3 also binds to the HIV-1 RNA sequence.

238 At late time points, notably at 24 h after T cell stimulation, we noted irregularities in the PLA data. This  
239 was not observed in the unstimulated cells. Upon close examination, we noted a high fraction of nuclei  
240 with multiple PLA signals in some of the samples (Fig 3D). PLA spots appear in the cytoplasm and even  
241 outside of the cell, and therefore were not recorded as Tat-ZFP3 PLA<sup>+</sup> cells earlier. We hypothesize that  
242 these clusters of PLA signal might be due to ZFP3 binding to the RNA sequence, apart from binding its  
243 target sequence in nuclear DNA. The 1C10 cells produce and bud off non-infectious viral particles after

244 activation. Consequently, Tat-ZFP3 PLA signal would also be detectable in the cytoplasm and in viral  
245 particles if ZFP3 binds to the LTR in the RNA. To test this hypothesis, we performed RNA-  
246 immunoprecipitation (RIP) using an anti-FLAG antibody. The results show that the pulled down FLAG-  
247 ZFP3 is associated with RNA from the LTR region of HIV-1 in activated cells (Fig 3E). This signal  
248 must originate from the 3' LTR as the TSS is downstream of the 5'LTR ZFP3 binding region, and thus  
249 not present in the HIV-1 RNA. As we are interested in Tat's role in the initiation of transcription, we  
250 decided to perform the following Tat-ZFP3-PLA experiments at 16 h, before viral RNA accumulation  
251 in the cytoplasm.

252 Activated cells accumulate in G1 while Tat is promoter-proximal in S-G2

253 Another observation we made here was that, compared to the unstimulated cells, fewer stimulated cells  
254 were recovered at the late time points despite same starting material. The 1C10 cells have a population  
255 doubling time of 20 h, resulting in the cell numbers more than double in the 24 h following culture  
256 addition of DMSO. However, cells grown in media with PMA/i did not change cell numbers in 24 h.  
257 This has previously been described as a consequence of a balance between activation-induced  
258 proliferation and AICD (Lissy et al., 1998). At 24 h, the growth of the 1C10 J-lat cells in PMA/i  
259 containing media was  $42\pm 5\%$  of the DMSO control. In addition, the viability was 83 % in PMA/i treated  
260 cells compared to 99 % for DMSO treated cells as evaluated by live-dead stain and flow cytometry (Fig  
261 S3A). Together, at 24 h after PMA/i-mediated activation, the surviving fraction was derived from 30 %  
262 of the original cells, thus the cell population at this time point did not represent the original population.  
263 Given the toxicity of HIV-1 proteins, we expect the surviving fraction to be enriched in cells that have  
264 expressed no, low or transient HIV-1 levels.

265 To further investigate the connection between T cell stimulation and Tat-dependent HIV-1 latency  
266 reversal, we interrogated the cell cycle profiles. The nuclear size was used as a proxy for cell cycle stage.  
267 In DMSO, the cell cycle profile remains similar throughout the 24 h time course (Fig 4A). After PMA/i  
268 treatment, cells appear to arrest in G1 (Fig 4B) as the percentage of cells in late S-G2 goes from  $40\pm 3\%$   
269 % at 3 h to  $25\pm 4\%$  % at 24 h (Fig 4C). Spontaneous or early PMA/i-induced GFP activation was found  
270 predominantly in cells of late S-G2 phases, as expected from HIV-1 latency reversal being linked to  
271 metabolically active cells. However, at later time points, GFP<sup>+</sup> cells accumulate in the G1 phase. With  
272 the G1/S arrest activated through the AICD process in the cells, cells with continuous activation of the  
273 HIV-1 would be expected to enrich in the G1 fraction, as we observed in the GFP<sup>+</sup> cells. However, the  
274 PLA<sup>+</sup> cells displayed a different pattern. At the 15 h time point, before the confounding factor of  
275 cytoplasmic spots occurred,  $55\pm 6\%$  of the Tat-ZFP3 PLA<sup>+</sup> cells were found in the late S-G2 phases.  
276 This demonstrates that the cells with Tat at the promoter were not affected by the G1/S arrest (Fig S3B).  
277 The lack of accumulation in G1 can only happen if Tat is transiently recruited to the HIV-1 promoter.  
278 From this analysis we conclude that whereas GFP detects the dying or arrested cells, Tat-ZFP3 PLA  
279 detects the fraction of proliferating cells that will preserve the pool of HIV-1 infected cells post-  
280 activation.

281 The chromatin composition of the HIV-1 promoter reflects latency reversal potential

282 Apart from allowing the detection of Tat at the promoter, we can also use the ZFP3 PLA assay to  
283 characterize the microenvironment of the HIV-1 provirus in other aspects, *e.g.*, to determine the  
284 suggested heterogeneity of chromatin marks in the reservoir of latently infected cells (Matsuda et al.,  
285 2015; Battivelli et al., 2018; Lindqvist et al., 2020). Here we queried the active marks H3K4me1,  
286 H3K4me3 and H3K27ac as well as heterochromatin marks H3K9me3 and H3K27me3 in addition to  
287 total H3 (Fig 5A). For the first time, we present direct single cell data of chromatin on the reversal of  
288 HIV-1 latency. H3 is expected to be detected in all cells. However, we only detect a H3-ZFP3 PLA  
289 signal in  $6.0\pm 1.8\%$  of DMSO treated cells and in  $11\pm 2\%$  of cells after PMA/i exposure. This increase  
290 most likely reflects a more accessible chromatin after activation. This low recovery prevents  
291 comparisons between antibodies, and rather suggests that comparisons should be made between  
292 unstimulated and stimulated cells. Strikingly, the activating chromatin marks, H3K4me3, H3K4me1 and  
293 H3K27ac seem not affected by stimulation whereas the heterochromatin marks, notably H3K9me3 is  
294 detected in more cells after T cell stimulation. H3K9me3 is the only mark that is significantly ( $p<0.005$ )

295 different in stimulated compared to unstimulated cells. Worth noting, these data are generated using the  
296 surviving fraction of cells that are still intact after 16 h of activation. As we determined previously, T  
297 cell stimulation decreases viability and the addition of toxic viral proteins after HIV latency reversal is  
298 likely to further reduce viability of virus-producing cells. The fraction of cells present on the coverslips  
299 were likely not to have produced large quantities of virus yet. These results are consistent with  
300 H3K9me3 at the provirus preventing HIV-1 reactivation and the toxic effects of viral expression.

301 Given the nature of the experiment, we had simultaneous access to the GFP expression and PLA signals  
302 in the same cells (Fig 5B). To test the reactivation potential associated with the histone modification,  
303 we compared the induction of GFP in the ZFP3 PLA<sup>+</sup> cells after T cell stimulation (Fig 5C). Cells with  
304 proviruses associated with all the tested histone modifications had significantly ( $p < 0.05$ ) higher GFP  
305 levels after activation. H3K4me3 had the highest relative GFP induction, followed by H3. The weakest  
306 evidence for GFP induction was detected with H3K9me3 and the enhancer mark H3K4me1. The GFP  
307 level in activated cells was even significantly ( $p < 0.05$ ) lower in H3K4me1-containing proviruses  
308 compared to total H3.

309 We then determined the distances of the HIV-1 proviruses to the nuclear periphery (Fig 5D). Proximity  
310 to the nuclear pore facilitates the export of the unspliced RNA required for viral production. The marks  
311 of active promoters, H3K4me3 and H3K27ac, were both significantly ( $p < 0.05$ ) closer to the nuclear  
312 periphery after T cell stimulation.

313 Enhancer H3K27ac is required for Tat-mediated HIV-1 activation

314 We have previously found that the marks of active enhancers—H3K4me1 in combination with H3K27ac—  
315 have a repressive function on HIV-1 (Lindqvist et al., 2020). Employing the ZFP3 PLA tool, we wanted  
316 to expand on our previous observation that enhancer-like chromatin modifies the activation status of the  
317 HIV-1 provirus. We treated the cells with GNE049, a specific small molecule inhibitor of CBP/P300-  
318 mediated H3K27ac at enhancers (Romero et al., 2017; Raisner et al., 2018). As expected, GNE049  
319 exposure led to decreased H3K27ac at the HIV-1 provirus (Fig 6A). However, without H3K27ac, Tat  
320 was no longer recruited to the promoter (Fig 6B). HIV-1 was still induced after GNE049 exposure as  
321 the GFP levels were induced as in the control T cell stimulation (Fig 6C). This shows that J-lat cells  
322 signal HIV-1 latency reversal through GFP despite the lack of Tat at the promoter. However, an enhancer  
323 structure of the provirus is required for a Tat-dependent latency reversal of HIV-1.

## 324 Discussion

325 Reversing proviral latency in the HIV-1 reservoir is highly complex. Even in a homogeneous population  
326 of cells, intercellular differences result in seemingly stochastic proviral reactivation. The processes  
327 leading to latency reversal are highly interconnected because of several positive feedback loops, *e.g.*,  
328 Tat regulating its own transcript and HIV-1 inducing cell death in bystander cells that in turn activates  
329 HIV-1. To disentangle the different activities, we present a single cell method that uniquely identifies a  
330 transient pulse of Tat in an early but essential step during HIV-1 latency reversal. Without Tat enforcing  
331 the HIV-1 transcription, cells do not shed viral particles. In combination with simultaneous GFP as a  
332 readout of total viral activation we can distinguish productive, Tat-dependent HIV-1 activation from  
333 spurious and non-physiological Tat-independent activation. In addition to providing an early readout for  
334 HIV-1 latency reversal, the proviral chromatin microenvironment can be interrogated in individual cells.  
335 The method is well suited to untangle mechanisms underlying latency reversal. We have here shown  
336 that the previously identified enhancer structure at the HIV-1 promoter is required for Tat recruitment  
337 and subsequent virus production. Tat initially enables processive HIV-1 transcription, but ensuing  
338 acetylation of Tat result in lost affinity for RNA and P-TEFb, consistent with the transient pulse of Tat  
339 we observe at the promoter (Kiernan et al., 1999; Kaehlcke et al., 2003). Our observation that ChIP pulls  
340 down Tat from within the provirus is intriguing, as the identified regions contain the major splice  
341 acceptor sites. The first splice donor is just downstream of the 5'LTR. A spatial structure where the  
342 spliceosome physically connects the splice donor and acceptor may explain the apparent non-promoter  
343 Tat peaks. This would also time the pulse of Tat to the phase of early mRNA production, in contrast to  
344 the later phase of RNAs containing intron-like structures. Proximity to nuclear pores will facilitate

345 nuclear export of transcripts with retained introns when they are bound by viral Rev. Rev disables the  
346 Trp-mediated gatekeeper of the nuclear pore (Coyle et al., 2011). As removal of Tat restores HIV-1  
347 latency, the observed transient pulse of Tat allows proliferation of the HIV-1 infected cells and expands  
348 the latent reservoir (Razooky et al., 2017).

349 The HIV-1 reservoir persists through proliferation (Chomont et al., 2009). This proliferation is driven  
350 both by antigens and homeostasis (Simonetti et al., 2020). While the decay of the reservoir is slow, the  
351 proviral chromatin is dynamic. Even in the absence of activating signals, the cellular fraction with  
352 heterochromatin and enhancer chromatin structures at the provirus expands (Lindqvist et al., 2020). We  
353 have shown that even in a rather homogeneous cell population, a multitude of different mutually  
354 exclusive chromatin structures are present at the HIV-1 integration site. None of the H3 modifications  
355 tested here completely prevented HIV-1 reactivation and even proviruses encapsulated in either of the  
356 heterochromatin marks H3K27me3 or H3K9me3 produced mRNA after T cell stimulation. H3K27me3  
357 is associated with bistable chromatin and recently it was shown that depletion of PRC1 lead to rapid  
358 removal of H2AK119ub. Even though the H3K27me3 mark was still present, transcription is  
359 derepressed (Dobrinić et al., 2020). The H3K9me3 mark is a repressive mark but repression depends on  
360 the binding of heterochromatin protein 1 (HP1). Different isoforms of HP1 exist. Whereas HP1 $\alpha$  and  
361 HP1 $\beta$  prevent promoter activity, HP1 $\gamma$  prevents transcription initiation but occupies regions downstream  
362 of the promoter in expressed genes, including HIV-1. Elimination of HP1 $\gamma$  has previously been linked  
363 to HIV-1 latency reversal (du Chene et al., 2007). The PMA/i-induced GFP in the cells with H3K9me3  
364 at the provirus (Fig 5C) might be explained by the presence of HP1 $\gamma$ .

365 Based on the data presented here, we propose a model (Fig 6D) of how the proviral chromatin  
366 composition affect the latently HIV-1 infected T cells after stimulation. T cell stimulation leads to initial  
367 cellular expansion and availability of transcription factors including NF $\kappa$ B. Proviruses present in a  
368 chromatin conformation resembling an active or poised host gene and thus associated with H3K4me3 at  
369 the promoter will be transcribed, resulting in mRNA production and protein production. These cells will  
370 also induce cell cycle arrest and AICD. In the presence of ART, the new viruses will not be able to infect  
371 other cells and this fraction of the latent reservoir will diminish. On the other hand, cells with a different  
372 chromatin composition at the provirus, e.g., H3K9me3 or H3K4me1 will activate the virus to a lesser  
373 extent upon T cell stimulus. Thereby these cells will induce apoptosis to a lesser extent. On the contrary,  
374 they have the potential to proliferate resulting in an expanded fraction of the reservoir. In this balance,  
375 the number of HIV-1 infected cells remain similar, but the HIV-1 reservoir gradually enters a deeper  
376 latency. In time, after spontaneous HIV-1 latency reversal and occasional activation of the CD4 cells,  
377 this would shape the HIV-1 reservoir, and the initially rare H3K9me3 proviruses becomes more  
378 prominent. A progressive reduction of easily activatable proviruses would explain the appearance of  
379 post-treatment controllers after long-term ART, despite the number of HIV-1 infected cells remaining  
380 similar (Namazi et al., 2018). Even though the proviruses in inaccessible H3K9me3 expand, this may  
381 not prevent a functional HIV-1 cure (Jiang et al., 2020). However, the more worrisome sub-compartment  
382 of the reservoir consists of cells with proviruses embedded in enhancer-like structures. These proviruses  
383 are in a stable silent state that remains open and accessible. Short transcripts are continuously produced,  
384 yet they are invisible to the immune system. These cells are likely to be responsible for rebound during  
385 ART interruptions (Moron-Lopez et al., 2019; Pasternak et al., 2020). Specifically eliminating this  
386 subpopulation of cells containing latent but reactivatable HIV-1 will reduce the fraction of the reservoir  
387 responsible for rebound viremia. We show here that, by using small molecules to eliminate the enhancer  
388 functionality of the provirus, Tat-independent HIV-1 latency reversal potentially eliminates this  
389 reservoir fraction.

## 390 Acknowledgements

391 The authors would like to thank Sara Svensson Akusjärvi for initial work with microscopy. This study  
392 was supported by grants from Swedish Research Council (2019-00991), Cancerfonden (12 0412 Pj) and  
393 Stiftelsen Läkare mot AIDS Forskningsfond (Fob2020-0004) to JPS, and Center for Innovative  
394 Medicine (FoUI-954473) to JPS and AS. We would like to acknowledge the core facilities MedH Core



395 Flow Cytometry facility (Karolinska Institutet) for providing cell analysis services, and BEA,  
396 Bioinformatics and Expression Analysis (Karolinska Institutet) for providing sequencing services.

## 397 Author contributions

398 BL, WA, JR, LL, TT, JPS performed the experiments. BL, JR and JPS analyzed the results. LL, BBJ,  
399 AS, EV provided intellectual input and revised the manuscript, AS and JPS obtained funding, JPS  
400 designed the study, wrote the manuscript. All authors read and approved the final manuscript.

## 401 Material and method

### 402 *Plasmid construction*

403 The ZFP3 sequence recognizing CGAGCCCTCAGATGC was synthesized by Genescript (NJ, USA).  
404 It was cloned into the plasmid pHR-SFFV-KRAB-dCas9-P2A-mCherry by substitution of KRAB-  
405 dCas9 cassette using Gibson assembly (New England Biolabs, Cat#E2611). Later the mCherry was  
406 substituted with BFP (Gilbert et al., 2014). Primers for Gibson assembly are found in Table S2. pHR-  
407 SFFV-KRAB-dCas9-P2A-mCherry was a gift from Jonathan Weissman (Addgene plasmid # 60954 ;  
408 <http://n2t.net/addgene:60954> ; RRID:Addgene\_60954)

### 409 *Cell culture*

410 J-lat 5A8 and 1C10 cells were cultured in cytokine-free media (RPMI 1640 medium (Hyclone, Cat#  
411 SH30096\_01), 10% FBS (Life Technologies, Cat# 10270-106), 1% Glutamax (Life Technologies, Cat#  
412 35050), 1% Penicillin-streptomycin (Life Technologies, Cat# 15140-122)).

### 413 *Virus production*

414 pHR-SFFV-ZF3-P2A-BFP, psPAX2 (Addgene, Cat#12260) and pMD2.G (VSV-g) (Addgene,  
415 Cat#12259) plasmids were purified with Plasmid Plus Maxi Kit (Qiagen, Cat# 12963). psPAX2 and  
416 pMD2.G were gifts from Didier Trono. 293T cells (ATCC, CRL-3216; CVCL\_0063) grown in DMEM  
417 media (Hyclone, Cat# SH30022\_01) were transfected with Lipofectamine LTX with PLUS reagent  
418 (ThermoFisher, Cat# 15338100), and after 48 h supernatants were harvested. We determined virus titers  
419 (p24) by Lenti-X GoStix Plus (Takara Bio Cat# 631280). 5A8 cells were transduced with 50 ng p24/10<sup>6</sup>  
420 cells. After 3 days, cells plated in 96-well plates for monoclonal cultures. After 14 days, several clones  
421 were tested for BFP expression and GFP expression with and without PMA/i exposure.

### 422 *Flow cytometry*

423 Cells were stained with LIVE/DEAD Fixable Violet Dead Cell Stain (ThermoFisher, Cat# L34955) and  
424 fixed in 2 % formaldehyde for 30 min. Flow analysis was performed on a CytoFLEX S (Beckman  
425 Coulter). Individual flow droplets were gated for lymphocytes, viability, and singlets. Data were  
426 analyzed by Flowjo 10.1 (Tree Star).

### 427 *Proximity ligation assay (PLA)*

428 Cells were washed with PBS and allowed to settle onto poly-l-lysine coated coverglasses (Corning  
429 Biocoat Cat#354085). PLA was performed according to the manufacturer's protocol (Sigma-Aldrich,  
430 cat#Duo92007) with a few modifications: PLA plus and minus probes were diluted 1:20, amplification  
431 buffer (5×) was used at 10×. Antibodies were used against Tat (Abcam Cat#43014), FLAG M2 (Sigma-  
432 Aldrich Cat# F1804 lot SLCF4933), H3 (Abcam, Cat# ab1791), H3K4me1 (Abcam, Cat# ab8895),  
433 H3K4me3 (Diagenode, Cat# C15410030), H3K9me3 (Abcam, Cat# ab8898), H3K27me3 (Diagenode,  
434 Cat#C15410069), H3K27ac (Abcam, Cat# ab4729). Before DAPI staining and mounting with ProLong  
435 Gold Antifade, FITC-conjugated anti-GFP (Abcam, Cat#ab6662) was applied (1:500) for 1 h at ambient  
436 temperature protected from light. Slides were sealed with nail polish and stored at 4 °C overnight before  
437 imaging. Slides were imaged using a Panoramic Midi II slide scanner (3DHitech) and images were  
438 exported using the CaseViewer application. Images were analyzed with ImageJ (version 2.0.0-rc-  
439 69/1.52) and macros developed in house. Each RGB image was separated into separate channels. Based  
440 on the blue (DAPI) channel, nuclei were identified. In the red channel, spots ("maxima") were detected  
441 with thresholds 6–48.

442 *Chemicals to induce proviral activation*

443 Cells were exposed to latency-reversal agents for 16 h. Drugs and chemicals used were phorbol 12-  
444 myristate 13-acetate (Sigma-Aldrich, Cat# 79346) final concentration 50 ng/ml, ionomycin (Sigma-  
445 Aldrich, Cat# I0634; Lot#106M4015V) final concentration 1  $\mu$ M, panobinostat (Cayman Chemicals,  
446 Cat# CAYM13280) final concentration 30 nM or 150 nM, JQ1 (Cayman Chemicals, Cat#CAYM11187)  
447 final concentration 100 nM, bryostatin (Biovision, Cat# BIOV2513) final concentration 10 nM,  
448 GNE049 (MedChemExpress, Cat# HY-108435).

449 *Chromatin immunoprecipitation*

450 ChIP-qPCR was performed using the iDeal ChIP-qPCR protocol (Diagenode, Cat# C01010180). Each  
451 ChIP reaction was performed on  $2 \times 10^6$  cells. Cells were fixed with 1 % formaldehyde for 10 min in  
452 room temperature. Sonication was performed at 30 s in eight cycles (Bioruptor Pico, Diagenode, Cat#  
453 B01060010). ChIP was performed using anti-FLAG antibody M2 (Sigma-Aldrich Cat# F1804 lot  
454 SLCF4933), or anti-Tat (Abcam Cat#43014). ChIP eluates were purified with Wizard SV Gel and PCR  
455 clean-up system (Promega, Cat# A9282). Primer sequences are shown in Table S2. PCR reactions were  
456 performed with Powerup Sybr green master mix (2 $\times$ ) (ThermoFisher, Cat#A25742) using 40 cycles on  
457 an Applied Biosystems 7500 Fast Real-Time PCR System (ThermoFisher).

458 *Massive parallel sequencing*

459 DNA samples were quantified with Qubit dsDNA HS Assay kit (ThermoFisher, Cat# Q32851) and  
460 libraries were prepared using NEBNext Ultra II DNA library kit. Libraries were sequenced on an  
461 Illumina Nextseq 550 (75 cycles, single-end sequencing) at the BEA facility (Huddinge, Sweden),  
462 according to the manufacturer's instructions. Raw data from the sequencing reactions (fastq files) were  
463 aligned to the hg38 genome assembly with Bowtie2 (version 2.0.6), set to the default parameters.  
464 Resulting sam files were converted to bam files using Samtools version 1.4. Bam files were imported  
465 into Galaxy (version 21.05, usegalaxy.org) or SeqMonk version 1.47.2.

466 *Native RNA-IP*

467  $2 \times 10^7$  cells were activated for 24 h with PMA/i or DMSO. Cells were washed in cold PBS, and KCl,  
468 EDTA and RNase Out were added. The cell pellet was lysed (50 mM Tris pH 8, 1% TritonX-100, 150  
469 mM NaCl, 1 mM DTT, 2 mM orthovanadate, PIC). The cells were rotated in 4 °C for 30 min and  
470 centrifugated in 4 °C 13,000 rpm for 20 min. Magnetic beads were washed in TBS-T (20 mM Tris pH  
471 7,4, 150 mM NaCl, 0.05 % Tween20), then in buffer NT2 (50 mM Tris-HCl pH7,4, 150 mM NaCl, 1  
472 mM MgCl<sub>2</sub>, 0.05 % TritonX-100, PIC). For each reaction, 2  $\mu$ l antibody and 25  $\mu$ l washed Pierce  
473 magnetic protein A/G beads were rotated 1 h in RT, before adding buffer (NT2. 20 mM EDTA, 1 mM  
474 DTT, 200 U/ml RNase Out, PIC) and cell lysate. Reactions were rotated overnight at 4 °C. The beads  
475 were washed six times. Trizol was added, 5 min RT, followed by addition of chloroform, 5 min. The  
476 reactions were centrifuged, and the upper aqueous phase was transferred to a new tube. RNA was  
477 purified (RNA clean and concentrator, Zymo research Cat#R1017). RNA, random hexamers 50 nM,  
478 dNTP, were incubated 5 min at 65 °C, then on ice 1 min. cDNA was generated using Superscript III  
479 (ThermoFisher Scientific Cat#18080093). cDNA was diluted 1:4 and used for qPCR with Powerup Sybr  
480 green master mix (2 $\times$ ) (ThermoFisher, Cat#A25742) using 40 cycles on an Applied Biosystems 7500  
481 Fast Real-Time PCR System (ThermoFisher). Primer sequences are found in Table S2.

482 *Data availability*

483 The ChIP-seq data have been deposited in the GEO database under ID GSE183275. Published dataset  
484 from (Reeder et al., 2015) was retrieved from GEO at GSE65689.

485

486

## 487 References

- 488 Battivelli, E., Dahabieh, M. S., Abdel-Mohsen, M., Svensson, J. P., Da Silva, I. T., Cohn, L. B., et al.  
489 (2018). Distinct chromatin functional states correlate with HIV latency reactivation in infected primary  
490 CD4(+) T cells. *Elife* 7. doi:ARTN e34655 10.7554/eLife.34655.
- 491 Bejarano, D. A., Peng, K., Laketa, V., Börner, K., Jost, K. L., Lucic, B., et al. (2019). HIV-1 nuclear  
492 import in macrophages is regulated by CPSF6-capsid interactions at the nuclear pore complex. *eLife* 8.  
493 doi:10.7554/eLife.41800.
- 494 Besnard, E., Hakre, S., Kampmann, M., Lim, H. W., Hosmane, N. N., Martin, A., et al. (2016). The  
495 mTOR Complex Controls HIV Latency. *Cell Host Microbe* 20, 785–797.  
496 doi:10.1016/j.chom.2016.11.001.
- 497 Blanco-Rodriguez, G., Gazi, A., Monel, B., Frabetti, S., Scoca, V., Mueller, F., et al. (2020).  
498 Remodeling of the Core Leads HIV-1 Preintegration Complex into the Nucleus of Human Lymphocytes.  
499 *J. Virol.* 94, e00135-20. doi:10.1128/JVI.00135-20.
- 500 Bruner, K. M., Wang, Z., Simonetti, F. R., Bender, A. M., Kwon, K. J., Sengupta, S., et al. (2019). A  
501 quantitative approach for measuring the reservoir of latent HIV-1 proviruses. *Nature*.  
502 doi:10.1038/s41586-019-0898-8.
- 503 Burdick, R. C., Li, C., Munshi, M., Rawson, J. M. O., Nagashima, K., Hu, W.-S., et al. (2020). HIV-1  
504 uncoats in the nucleus near sites of integration. *Proc. Natl. Acad. Sci. U. S. A.* 117, 5486–5493.  
505 doi:10.1073/pnas.1920631117.
- 506 Capelson, M., Liang, Y., Schulte, R., Mair, W., Wagner, U., and Hetzer, M. W. (2010). Chromatin-  
507 bound nuclear pore components regulate gene expression in higher eukaryotes. *Cell* 140, 372–383.  
508 doi:10.1016/j.cell.2009.12.054.
- 509 Chan, J. K., Bhattacharyya, D., Lassen, K. G., Ruelas, D., and Greene, W. C. (2013).  
510 Calcium/Calcineurin Synergizes with Prostratin to Promote NF-kappa B Dependent Activation of Latent  
511 HIV. *Plos One* 8. doi:ARTN e77749 10.1371/journal.pone.0077749.
- 512 Chen, H. C., Martinez, J. P., Zorita, E., Meyerhans, A., and Filion, G. J. (2017). Position effects influence  
513 HIV latency reversal. *Nat. Struct. Mol. Biol.* 24, 47–54. doi:10.1038/nsmb.3328.
- 514 Chomont, N., El-Far, M., Ancuta, P., Trautmann, L., Procopio, F. A., Yassine-Diab, B., et al. (2009).  
515 HIV reservoir size and persistence are driven by T cell survival and homeostatic proliferation. *Nat. Med.*  
516 15, 893–900. doi:10.1038/nm.1972.
- 517 Coyle, J. H., Bor, Y.-C., Rekosh, D., and Hammarskjöld, M.-L. (2011). The Tpr protein regulates export  
518 of mRNAs with retained introns that traffic through the Nxf1 pathway. *RNA N. Y. N* 17, 1344–1356.  
519 doi:10.1261/rna.2616111.
- 520 Dobrinić, P., Szczurek, A. T., and Klose, R. J. (2020). PRC1 drives Polycomb-mediated gene repression  
521 by controlling transcription initiation and burst frequency. *bioRxiv*, 2020.10.09.333294.  
522 doi:10.1101/2020.10.09.333294.
- 523 du Chene, I., Basyuk, E., Lin, Y. L., Triboulet, R., Knezevich, A., Chable-Bessia, C., et al. (2007).  
524 Suv39H1 and HP1 gamma are responsible for chromatin-mediated HIV-1 transcriptional silencing and  
525 post-integration latency. *EMBO J* 26, 424–435. doi:10.1038/sj.emboj.7601517.
- 526 Gilbert, L. A., Horlbeck, M. A., Adamson, B., Villalta, J. E., Chen, Y., Whitehead, E. H., et al. (2014).  
527 Genome-Scale CRISPR-Mediated Control of Gene Repression and Activation. *Cell* 159, 647–661.  
528 doi:10.1016/j.cell.2014.09.029.
- 529 Gülow, K., Kaminski, M., Darvas, K., Süß, D., Li-Weber, M., and Krammer, P. H. (2005). HIV-1 trans-  
530 activator of transcription substitutes for oxidative signaling in activation-induced T cell death. *J.*  
531 *Immunol. Baltim. Md* 1950 174, 5249–5260. doi:10.4049/jimmunol.174.9.5249.
- 532 Jiang, C., Lian, X., Gao, C., Sun, X., Einkauf, K. B., Chevalier, J. M., et al. (2020). Distinct viral  
533 reservoirs in individuals with spontaneous control of HIV-1. *Nature* 585, 261–267. doi:10.1038/s41586-  
534 020-2651-8.
- 535 Jordan, A., Bisgrove, D., and Verdin, E. (2003). HIV reproducibly establishes a latent infection after  
536 acute infection of T cells in vitro. *Embo J.* 22, 1868–1877.
- 537 Kaehlcke, K., Dorr, A., Hetzer-Egger, C., Kiermer, V., Henklein, P., Schnoelzer, M., et al. (2003).  
538 Acetylation of Tat defines a cyclinT1-independent step in HIV transactivation. *Mol. Cell* 12, 167–76.  
539 doi:10.1016/s1097-2765(03)00245-4.
- 540 Kauder, S. E., Bosque, A., Lindqvist, A., Planelles, V., and Verdin, E. (2009). Epigenetic Regulation of

- 541 HIV-1 Latency by Cytosine Methylation. *Plos Pathog.* 5. doi:ARTN e1000495  
542 10.1371/journal.ppat.1000495.
- 543 Khan, S. Z., Hand, N., and Zeichner, S. L. (2015). Apoptosis-induced activation of HIV-1 in latently  
544 infected cell lines. *Retrovirology* 12, 42. doi:10.1186/s12977-015-0169-1.
- 545 Kiernan, R. E., Vanhulle, C., Schiltz, L., Adam, E., Xiao, H., Maudoux, F., et al. (1999). HIV-1 tat  
546 transcriptional activity is regulated by acetylation. *EMBO J.* 18, 6106–6118.  
547 doi:10.1093/emboj/18.21.6106.
- 548 Li, C., Mousseau, G., and Valente, S. T. (2019). Tat inhibition by didehydro-Cortistatin A promotes  
549 heterochromatin formation at the HIV-1 long terminal repeat. *Epigenetics Chromatin* 12, 23.  
550 doi:10.1186/s13072-019-0267-8.
- 551 Lindqvist, B., Svensson Akusjarvi, S., Sonnerborg, A., Dimitriou, M., and Svensson, J. P. (2020).  
552 Chromatin maturation of the HIV-1 provirus in primary resting CD4+ T cells. *Plos Pathog.* 16,  
553 e1008264. doi:10.1371/journal.ppat.1008264.
- 554 Lissy, N. A., Van Dyk, L. F., Becker-Hapak, M., Vocero-Akbani, A., Mendler, J. H., and Dowdy, S. F.  
555 (1998). TCR antigen-induced cell death occurs from a late G1 phase cell cycle check point. *Immunity* 8,  
556 57–65. doi:10.1016/s1074-7613(00)80458-6.
- 557 Lucic, B., Chen, H. C., Kuzman, M., Zorita, E., Wegner, J., Minneker, V., et al. (2019). Spatially  
558 clustered loci with multiple enhancers are frequent targets of HIV-1 integration. *Nat. Commun.* 10, 4059.  
559 doi:10.1038/s41467-019-12046-3.
- 560 Marban, C., Su, T., Ferrari, R., Li, B., Vatakis, D., Pellegrini, M., et al. (2011). Genome-wide binding  
561 map of the HIV-1 Tat protein to the human genome. *Plos One* 6, e26894.  
562 doi:10.1371/journal.pone.0026894.
- 563 Marini, B., Kertesz-Farkas, A., Ali, H., Lucic, B., Lisek, K., Manganaro, L., et al. (2015). Nuclear  
564 architecture dictates HIV-1 integration site selection. *Nature* 521, 227–231. doi:10.1038/nature14226.
- 565 Matsuda, Y., Kobayashi-Ishihara, M., Fujikawa, D., Ishida, T., Watanabe, T., and Yamagishi, M.  
566 (2015). Epigenetic Heterogeneity in HIV-1 Latency Establishment. *Sci. Rep.* 5. doi:Artn 7701  
567 10.1038/Srep07701.
- 568 Migueles, S. A., Osborne, C. M., Royce, C., Compton, A. A., Joshi, R. P., Weeks, K. A., et al. (2008).  
569 Lytic granule loading of CD8+ T cells is required for HIV-infected cell elimination associated with  
570 immune control. *Immunity* 29, 1009–1021. doi:10.1016/j.immuni.2008.10.010.
- 571 Moron-Lopez, S., Kim, P., Sogaard, O. S., Tolstrup, M., Wong, J. K., and Yukl, S. A. (2019).  
572 Characterization of the HIV-1 transcription profile after romidepsin administration in ART-suppressed  
573 individuals. *Aids* 33, 425–431. doi:10.1097/QAD.0000000000002083.
- 574 Morton, E. L., Forst, C. V., Zheng, Y., DePaula-Silva, A. B., Ramirez, N.-G. P., Planelles, V., et al.  
575 (2019). Transcriptional Circuit Fragility Influences HIV Proviral Fate. *Cell Rep.* 27, 154-171.e9.  
576 doi:10.1016/j.celrep.2019.03.007.
- 577 Namazi, G., Fajnzylber, J. M., Aga, E., Bosch, R. J., Acosta, E. P., Sharaf, R., et al. (2018). The Control  
578 of HIV After Antiretroviral Medication Pause (CHAMP) Study: Posttreatment Controllers Identified  
579 From 14 Clinical Studies. *J. Infect. Dis.* 218, 1954–1963. doi:10.1093/infdis/jiy479.
- 580 Pasternak, A. O., Grijnsen, M. L., Wit, F. W., Bakker, M., Jurriaans, S., Prins, J. M., et al. (2020). Cell-  
581 associated HIV-1 RNA predicts viral rebound and disease progression after discontinuation of  
582 temporary early ART. *JCI Insight* 5. doi:10.1172/jci.insight.134196.
- 583 Pinzone, M. R., VanBelzen, D. J., Weissman, S., Bertuccio, M. P., Cannon, L., Venanzi-Rullo, E., et al.  
584 (2019). Longitudinal HIV sequencing reveals reservoir expression leading to decay which is obscured  
585 by clonal expansion. *Nat. Commun.* 10, 728. doi:10.1038/s41467-019-08431-7.
- 586 Raisner, R., Kharbanda, S., Jin, L., Jeng, E., Chan, E., Merchant, M., et al. (2018). Enhancer Activity  
587 Requires CBP/P300 Bromodomain-Dependent Histone H3K27 Acetylation. *Cell Rep.* 24, 1722–1729.  
588 doi:10.1016/j.celrep.2018.07.041.
- 589 Razooky, B. S., Cao, Y. F., Hansen, M. M. K., Perelson, A. S., Simpson, M. L., and Weinberger, L. S.  
590 (2017). Nonlatching positive feedback enables robust bimodality by decoupling expression noise from  
591 the mean. *Plos Biol.* 15. doi:ARTN e2000841 10.1371/journal.pbio.2000841.
- 592 Reeder, J. E., Kwak, Y.-T., McNamara, R. P., Forst, C. V., and D’Orso, I. (2015). HIV Tat controls  
593 RNA Polymerase II and the epigenetic landscape to transcriptionally reprogram target immune cells.  
594 *eLife* 4. doi:10.7554/eLife.08955.
- 595 Romero, F. A., Murray, J., Lai, K. W., Tsui, V., Albrecht, B. K., An, L., et al. (2017). GNE-781, A



596 Highly Advanced Potent and Selective Bromodomain Inhibitor of Cyclic Adenosine Monophosphate  
597 Response Element Binding Protein, Binding Protein (CBP). *J Med Chem* 60, 9162–9183.  
598 doi:10.1021/acs.jmedchem.7b00796.  
599 Sarabia, I., Huang, S.-H., Ward, A. R., Jones, R. B., and Bosque, A. (2021). The Intact Non-Inducible  
600 Latent HIV-1 Reservoir is Established In an In Vitro Primary TCM Cell Model of Latency. *J. Virol.*  
601 doi:10.1128/JVI.01297-20.  
602 Sherrill-Mix, S., Lewinski, M. K., Famiglietti, M., Bosque, A., Malani, N., Ocwieja, K. E., et al. (2013).  
603 HIV latency and integration site placement in five cell-based models. *Retrovirology* 10, 90.  
604 doi:10.1186/1742-4690-10-90.  
605 Simonetti, F. R., Zhang, H., Soroosh, G. P., Duan, J., Rhodehouse, K., Hill, A. L., et al. (2020). Antigen-  
606 driven clonal selection shapes the persistence of HIV-1 infected CD4+ T cells in vivo. *J. Clin. Invest.*  
607 doi:10.1172/jci145254.  
608 Soderberg, O., Gullberg, M., Jarvius, M., Ridderstrale, K., Leuchowius, K. J., Jarvius, J., et al. (2006).  
609 Direct observation of individual endogenous protein complexes in situ by proximity ligation. *Nat.*  
610 *Methods* 3, 995–1000. doi:10.1038/nmeth947.  
611 Wang, P., Qu, X., Wang, X., Zhu, X., Zeng, H., Chen, H., et al. (2014). Specific reactivation of latent  
612 HIV-1 with designer zinc-finger transcription factors targeting the HIV-1 5'-LTR promoter. *Gene Ther.*  
613 21, 490–495. doi:10.1038/gt.2014.21.  
614 Yukl, S. A., Kaiser, P., Kim, P., Telwatte, S., Joshi, S. K., Vu, M., et al. (2018). HIV latency in isolated  
615 patient CD4(+) T cells may be due to blocks in HIV transcriptional elongation, completion, and splicing.  
616 *Sci. Transl. Med.* 10. doi:ARTN eaap9927 10.1126/scitranslmed.aap9927.  
617  
618

619 Figure legends

620

621 **Fig 1. PLA detects Tat at the HIV-1 promoter.**

622 (A) The HIV-1 promoter with the zinc finger protein ZFP3 (orange), and an adjacent protein, here Tat  
623 (pink) recognized by two oligonucleotide-conjugated antibodies that are ligated to enable rolling circle  
624 amplification, and subsequent binding of fluorescently labelled probes during PLA. (B) Immunoblot  
625 using antibody against FLAG in 1C10 cells, a clone of HIV-1 containing J-lat 5A8 cells infected with  
626 FLAG-tagged ZFP3, and parental 5A8 cells treated with DMSO or PMA/i for 24 h. (C) ChIP-qPCR of  
627 FLAG in 1C10 and 5A8 cells ( $n=3$ , s.e.m.). (D) Venn diagram of MACS2 peaks (filtered:  $-\log(q)>10$ ,  
628  $\text{size}<1\text{kb}$ ) from ChIP-seq with anti-FLAG in 1C10 cells ( $n=2$ ). (E) PLA with 1C10 cells treated with  
629 DMSO or PMA/i for 16 h. Nuclei were stained with DAPI, green shows GFP expression and red shows  
630 PLA spots. White arrows points to the PLA spots. (F–G) Quantification of Tat-ZFP3 PLA<sup>+</sup> cells (F) and  
631 GFP<sup>+</sup> cells (G), (H) Venn diagram showing the overlap between GFP<sup>+</sup> and Tat-ZFP3 PLA<sup>+</sup> cells, (I)  
632 Distance of PLA spots to nuclear periphery ( $n=5$ ). (B, F, G) Student t-test p-values \*  $p<0.05$ , \*\*  $p<0.01$ ,  
633 \*\*\* $p<0.005$ .

634

635 **Fig 2. Tat is predominantly found at the HIV-1 promoter in PMA/i activated cells.**

636 (A) Immunoblot of Tat. A well-described unspecific band (\*) is used as loading control. (B) ChIP-qPCR  
637 of Tat at three positions of the HIV-1 provirus and control ( $n=3$ , s.e.m.). (C) Heatmaps of ChIP-seq  
638 against Tat in cells unstimulated (DMSO) or stimulated (PMAi) relative to input or stimulated relative  
639 to unstimulated ( $n=2$ ). (D–E) Genome browser view of Tat ChIP-seq, the CD69 locus with the exons in  
640 black and the Tat-ChIP peaks from Reeder et al (2015) in blue at the bottom (D) and the HIV-1 locus  
641 (E).

642

643 **Fig 3. Tat is recruited to the HIV-1 promoter early after T cell activation but binds to cytoplasmic  
644 HIV-1 RNA at late timepoints.**

645 (A) Time-series with Tat-ZFP3 PLA spots ( $n=4$ ). (B) Time-series with GFP. (C) GFP intensity of the  
646 Tat-ZFP3 PLA<sup>+</sup> cells in arbitrary units (D) Micrograph of DAPI-stained (blue) 1C10 cells 24 h after  
647 PMA/i exposure. ZFP3-Tat PLA spots in red, GFP in green (E). RNA-immunoprecipitation (RIP) using  
648 anti-FLAG. 1C10 cells containing ZFP3-FLAG were treated 24 h with PMA/i or DMSO, qPCR was  
649 performed using three primers in HIV-1 and normalized to human *rpp30* ( $n=3$ , error bars represent  
650 s.e.m.).

651

652 **Fig 4. Tat is transiently bound to HIV-1 promoter in all cell cycle stages.**

653 (A–B) Nuclear area was calculated in unstimulated cells (DMSO) (A) or stimulated cells (PMA/i) (B)  
654 from the micrographs at 9–24 h chemical exposure. (C) Percentage of cells with nuclear area  $>40\mu\text{m}^2$   
655 corresponding to late S–G2 phase of the cell cycle at different time points after T cell stimulation. All  
656 cells in grey, Tat-ZFP3 PLA<sup>+</sup> cells in red, GFP<sup>+</sup> cells in black,  $n=5$ , error bars represent s.e.m., Student  
657 t-test p-values \*  $p<0.05$ , \*\*  $p<0.01$ , \*\*\* $p<0.005$ .

658

659 **Fig 5. Non-permissive chromatin marks increase in the surviving population after T cell  
660 stimulation.**

661 (A) H3 modifications found at the HIV-1 promoter at 16 h post T cell stimulation. (B) GFP expression  
662 in cells with HIV-1 associated with different marks. (C) Quantification of GFP. (D) Distance to nuclear  
663 periphery of the HIV-1 locus. P-values \*  $p < 0.05$ , \*\*  $p < 0.01$ , \*\*\*  $p < 0.005$

664

665 **Fig 6. GNE049 reduces H3K27ac and prevents Tat at the promoter without affecting HIV-1**  
666 **activation.**

667 (A) H3K27ac-ZFP3 PLA in cells pretreated with GNE049 (a CBP/P300 inhibitor of enhancer H3K27ac)  
668 or DMSO for 3 h followed by 16 h with DMSO or PMA/i. (B) Tat-ZFP3 PLA in the same cells as in  
669 (A). (C) Percentage of total GFP<sup>+</sup> cells treated as in (A). (D) Model of different reservoir compartments  
670 after T cell stimulation: upper) high viral production, both dependent and independent of Tat, toxicity  
671 leads to cell cycle arrest and cell death; lower) low Tat-mediated viral production in cells with proviral  
672 H3K9me3 or H3K4me1, where cells proliferate and return to latency.

673

674 Supplementary material

675 **Table S1.** MACS2 peaks of ChIP-seq using antibodies against FLAG and Tat after treatment with  
676 DMSO or PMA/i for 24 h.

677 **Table S2.** Primers used for Gibson assembly, ChIP and RIP.

678

679 **Fig S1. Detecting HIV-1 using proximity ligation assay (PLA).**

680 (A) Flow cytometry of 5A8 and 1C10 cells, showing BFP (V450-A) against SSC (SSC-A). (B) Boxplot  
681 with the GFP levels relative to intensity of the PLA spot. (C) GFP intensity in Tat-ZFP3 PLA<sup>+</sup> cells after  
682 16 h treatment with DMSO or PMA/i. Dotted line shows the background cellular GFP intensity. (D)  
683 Flow cytometry of 1C10 cells showing GFP (B525-A) against BFP (V450-A) in unstimulated (DMSO)  
684 or stimulated (PMA/i) cells after 24 h (E) Distance between the PLA spot and the nuclear periphery,  
685  $n=4$  (F) Genome browser view of *the MAT2A* locus, harboring the HIV-1 provirus.

686

687 **Fig S2. PLA and GFP capture slightly different aspects of HIV-1 activation following LRA.**

688 (A–B) Response to latency reversal agents (LRAs) in J-lat 1C10 detected by PLA Tat-ZFP3 (A) and  
689 GFP (B). (C) Correlation between GFP and PLA spot.  $n=5$ , error bars show s.e.m.

690

691 **Fig S3. Cells accumulate in G1–early S following PMA/i-mediated stimulation.**

692 (A) Percentage of live 5A8 cells after T cell stimulation recorded by live/dead cell stain using flow  
693 cytometry ( $n=3$ ). (B) Percentage of 1C10 cells with nuclear area 20–40  $\mu\text{m}^2$  corresponding to G1–early  
694 S phase of the cell cycle. All cells in white, Tat-ZFP3 PLA<sup>+</sup> cells in red, GFP<sup>+</sup> cells in green,  $n=5$  error  
695 bars represent s.e.m., Student t-test p-values \*  $p < 0.05$ .

696

697

## T cell stimulation remodels the latently HIV-1 infected cell population by differential activation of proviral chromatin

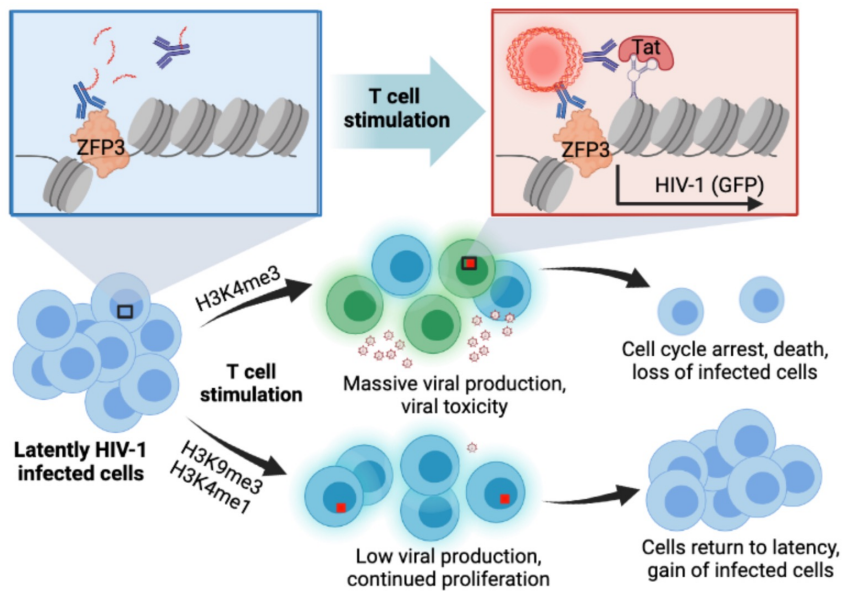

Graphical abstract.



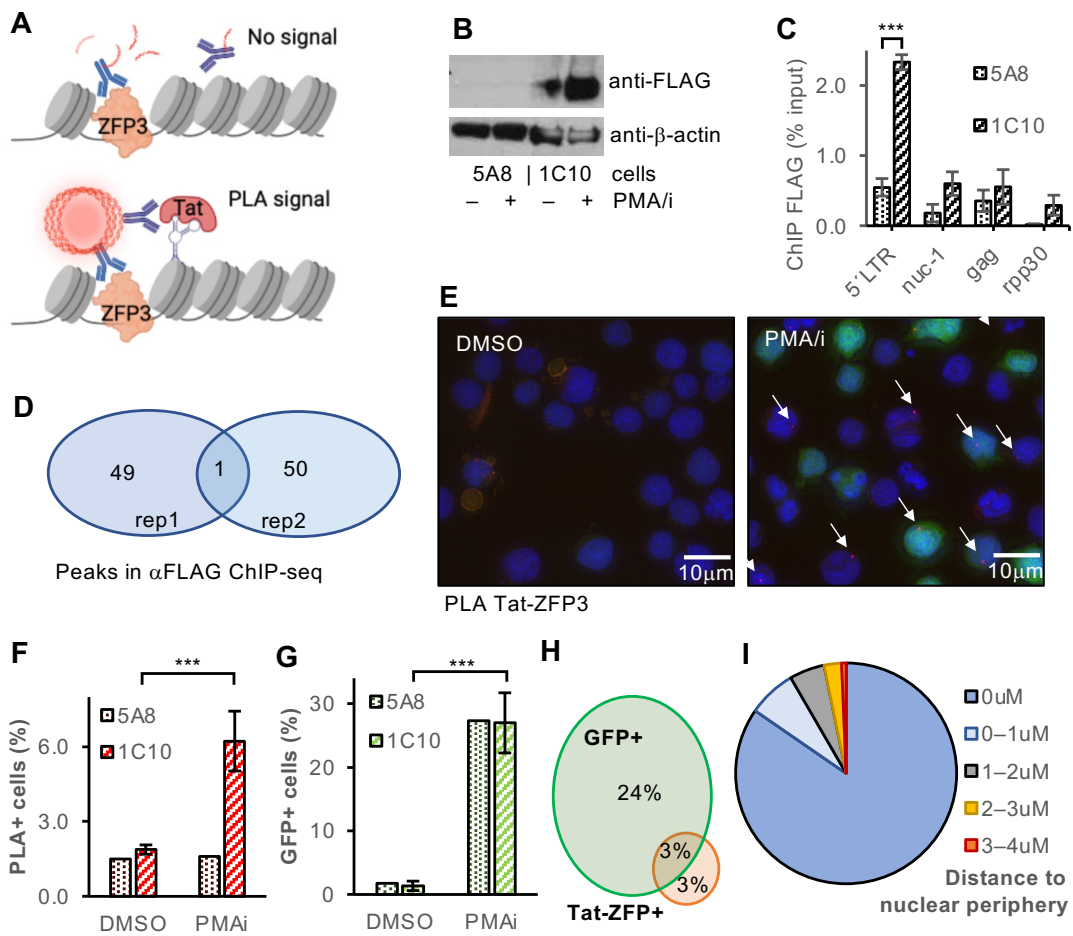

Fig 1.



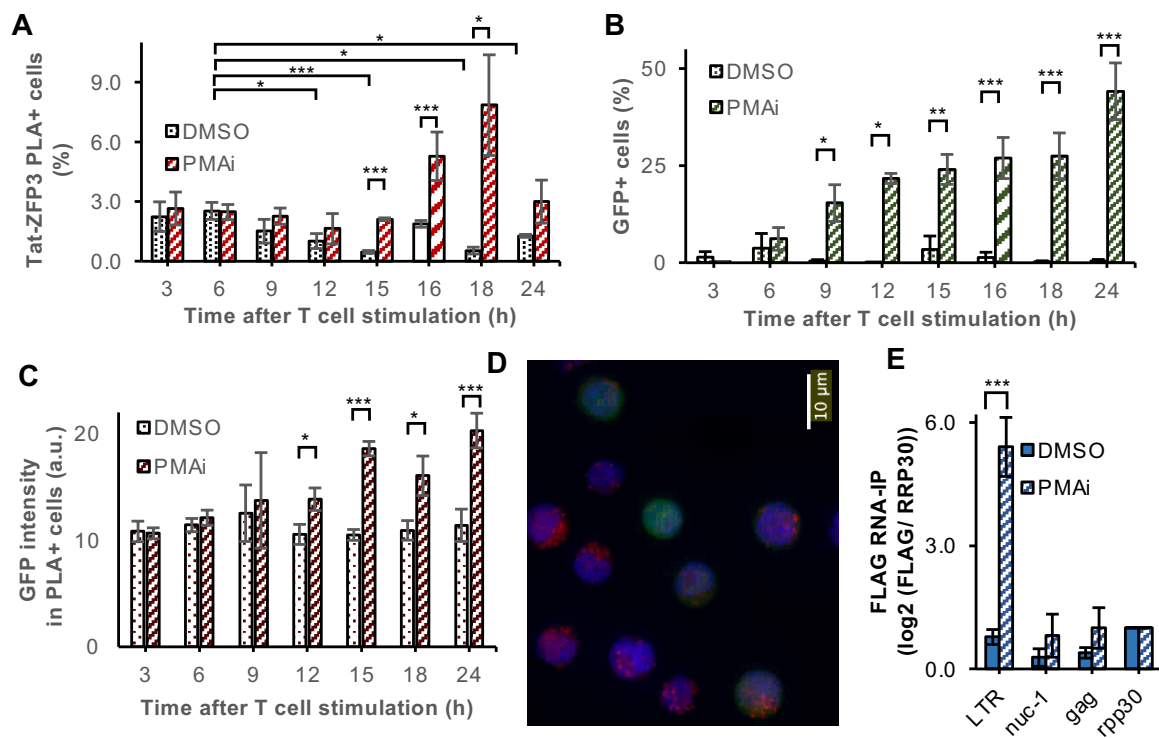

Fig 3.

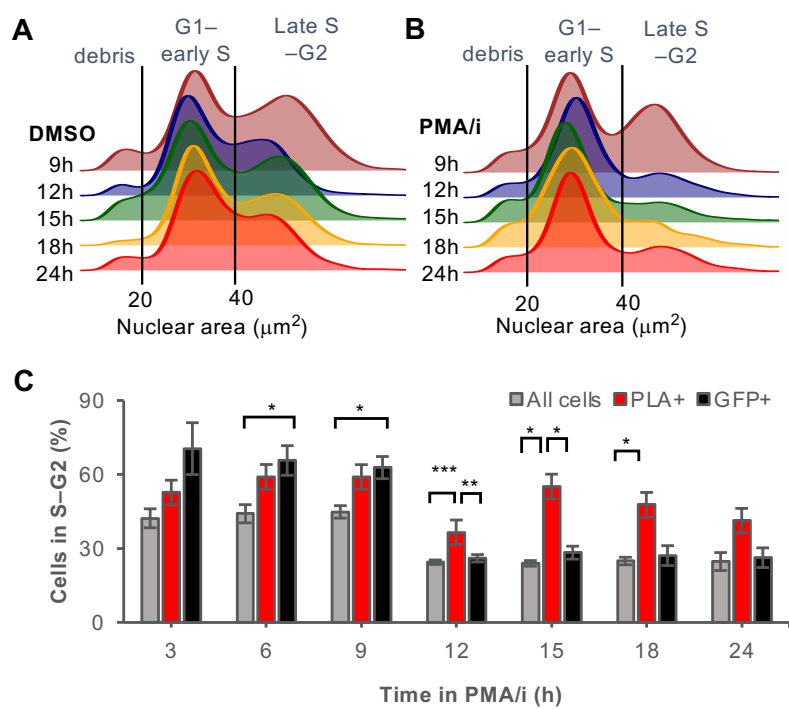

Fig 4.



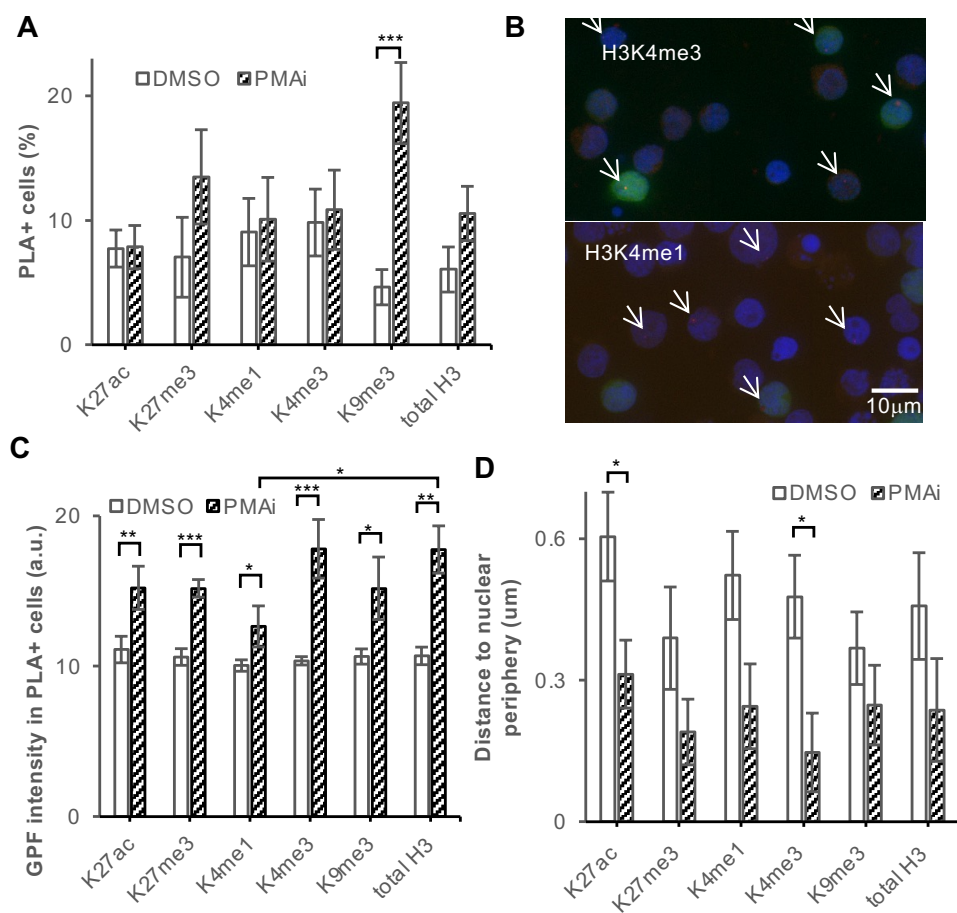

Fig 5.

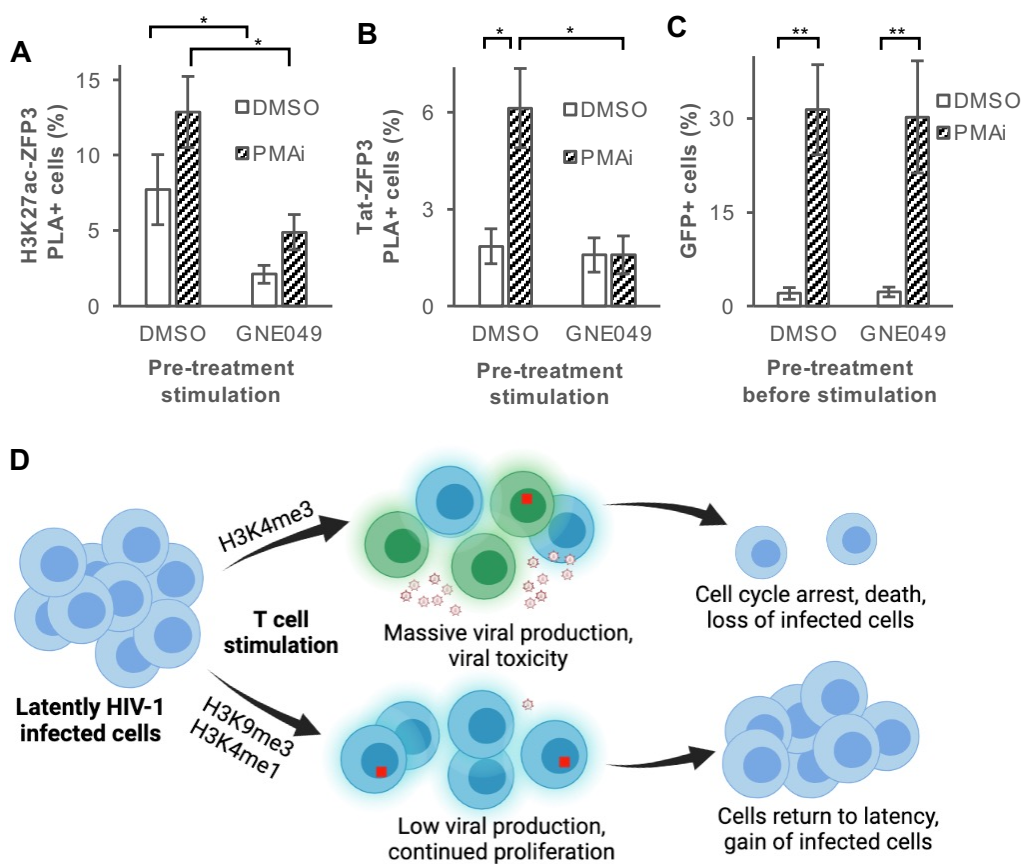

Fig 6.
